# Supplementary material
Source: publisher figshare collection journal article supplement (https://acs.figshare.com/ndownloader/files/25587940)
Supplement: Supplementary file 1 [file 25587940]

# Supplemental Material for “Spin-Orbit Coupling Determined Topological Phase: Topological Insulator and Quadratic Dirac Semimetals”

Lu Tian, Ying Liu\*, Weizhen Meng, Xiaoming Zhang, Xuefang Dai, and Guodong Liu\*

School of Materials Science and Engineering, Hebei University of Technology, Tianjin 300130, China.

E-mail: ying\_liu@hebut.edu.cn; gdliu1978@126.com

## A. Surface Band Structure for the Triple Degeneracy

To illustrate the topology of triple degenerate point in  $Y_3XC$  ( $X=Ga, Tl$ ), we plot the surface spectrum on (001) surface. Obviously, there exists surfaces states starting from the triple degenerate point (see in Fig. S1).

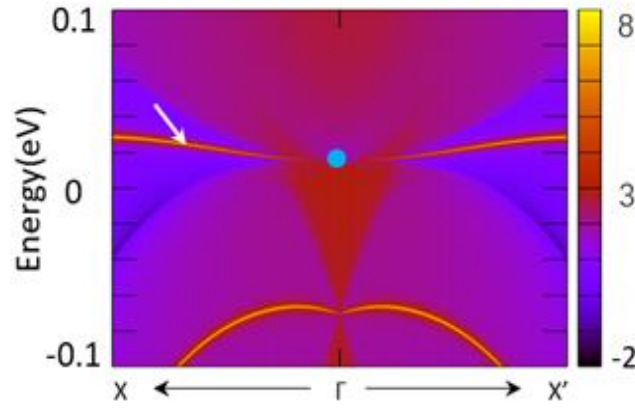

Fig.S1 Surface spectrum for the triple degenerate in  $Y_3GaC$  on (001) surface. The white arrow points to the surface states, cyan dot marks the triple degenerate point.

## B. Topological Phase Transition Induced by a Zeeman Field

In this SM, we use the model to study topological phase transition under a Zeeman field. We have mentioned that the effective model we have derived Eq. (2) is based on states of  $j = 3/2$ , then the Zeeman field can be written in the form of

$$\mathcal{H}_Z = -\mathbf{B} \cdot \mathbf{J},$$

with  $\mathbf{J}$  as the vector of the  $J = 3/2$  spin matrices.

Under a Zeeman field, the time reversal symmetry is broken, the quadratic Dirac point is expected to be transformed into pairs of Weyl points. To demonstrate it, we apply a Zeeman field along high symmetric path, namely, [100] direction.

In this case,  $\mathcal{H}_Z = -MJ_x$ , the total Hamiltonian takes the form of  $\mathcal{H} = \mathcal{H}_{\text{soc}} + \mathcal{H}_Z$ .

We first search band crossings along  $k_x$  axis, then two pairs (W1, W2) of Weyl points are expected to appear. For concreteness, the eigenenergies for  $\mathcal{H}$  along  $k_x$  are given by

$$E_{1,2} = -\alpha k_x^2 \pm \frac{B}{2}, \quad E_{3,4} = \alpha k_x^2 \pm \frac{3B}{2}.$$

Accordingly, if  $\alpha > 0$ ,  $E_{1,2}$  will cross with  $E_4$  at  $K_1 = \left(\pm\sqrt{\frac{B}{\alpha}}, 0, 0\right)$ ,  $K_2 =$

$\left(\pm\sqrt{\frac{B}{2\alpha}}, 0, 0\right)$ , respectively. Taking suitable parameters, we present the energy

spectrum under a Zeeman field around the quadratic Dirac point in Fig.S1.

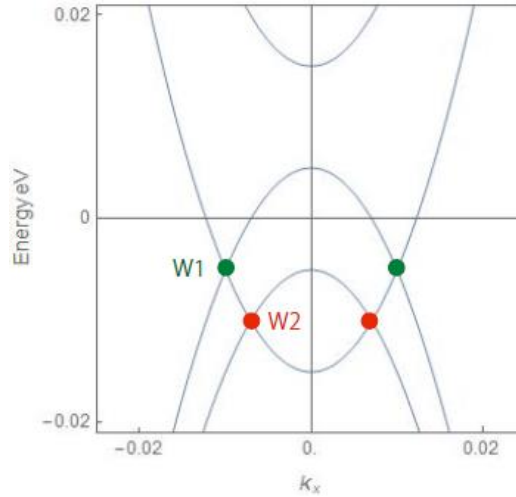

Fig.S2 Band structure under a Zeeman field along [100] direction. In the calculation, we take  $M = 0, B = 10 \text{ meV}, \alpha = 10 \text{ eV} \cdot \text{\AA}, \gamma = 17 \text{ eV} \cdot \text{\AA}$ .

### Effective Hamiltonian for Weyl Points

For the first pair of Weyl points which locate at  $K_1 = \left( \pm \sqrt{\frac{B}{\alpha}}, 0, 0 \right)$ , one can derive the degenerate eigenstates at these two points, specifically,

$$|\psi_1\rangle = \frac{1}{\sqrt{2}}(-1, 0, 0, 1)^T, \quad |\psi_2\rangle = \frac{1}{\sqrt{2}}(0, -1, 1, 0)^T.$$

Then the effective Hamiltonian around  $K_1$  is given by

$$\mathcal{H}_1 = \begin{pmatrix} \langle \psi_1 | \mathcal{H}_{soc} | \psi_1 \rangle & \langle \psi_1 | \mathcal{H}_{soc} | \psi_2 \rangle \\ \langle \psi_2 | \mathcal{H}_{soc} | \psi_1 \rangle & \langle \psi_2 | \mathcal{H}_{soc} | \psi_2 \rangle \end{pmatrix}.$$

Then we expand the model at  $K_1$ , after a unitary transformation, we have the Hamiltonian takes the form as

$$\mathcal{H}_1(\mathbf{q}) = v_x q_x \sigma_z + [(\gamma_+ q_-^2 + \gamma_- q_+^2) \sigma_+ + h.c.],$$

with  $\gamma_{\pm} = \frac{1}{8}(\sqrt{3}\alpha \pm \gamma)$ ,  $q_{\pm} = q_y \pm i q_z$ ,  $\sigma_{\pm} = \sigma_x \pm i \sigma_y$ . The chirality of the Weyl point is determined by  $\text{sgn}(|\gamma_+| - |\gamma_-|) = \pm 2$ .

The effective Hamiltonian expanded from  $K_2 = \left( \pm \sqrt{\frac{B}{2\alpha}}, 0, 0 \right)$  can be derived in the same way. Here, the degenerate states take the form of

$$\psi_3 = \frac{1}{2\sqrt{2}}(-2, -\sqrt{3}, 0, 1)^T, \quad \psi_4 = \frac{1}{2\sqrt{2}}(0, 1, 2, \sqrt{3})^T.$$

Such that the effective Hamiltonian for the band crossing around  $K_2$  is given by

$$\mathcal{H}_2 = \begin{pmatrix} \langle \psi_3 | \mathcal{H}_{soc} | \psi_3 \rangle & \langle \psi_3 | \mathcal{H}_{soc} | \psi_4 \rangle \\ \langle \psi_4 | \mathcal{H}_{soc} | \psi_3 \rangle & \langle \psi_4 | \mathcal{H}_{soc} | \psi_4 \rangle \end{pmatrix}.$$

To derive the main feature at  $K_2$ , we also expand it at this point, thus

$$\mathcal{H}_2(\mathbf{q}) = v_x q_x \sigma_z + v_y q_y \sigma_y - v_z q_z \sigma_x.$$

Here,  $v_y = v_z = \gamma \sqrt{\frac{M}{\alpha}}$ ,  $v_x = 2\sqrt{M\alpha}$ . This model is a typical single Weyl point.
